# Supplementary material for: Comprehensive insights into transcriptional adaptation of intracellular mycobacteria by microbe-enriched dual RNA sequencing
Source: PubMed Central journal article supplement (PMC4334782; doi:10.1186/s12864-014-1197-2), 2015-02-05

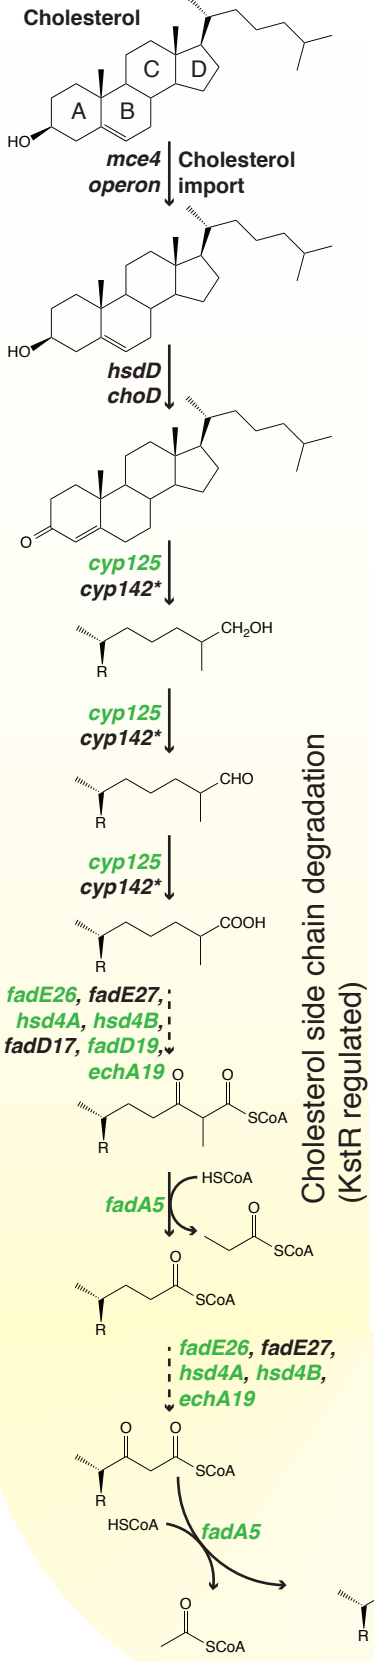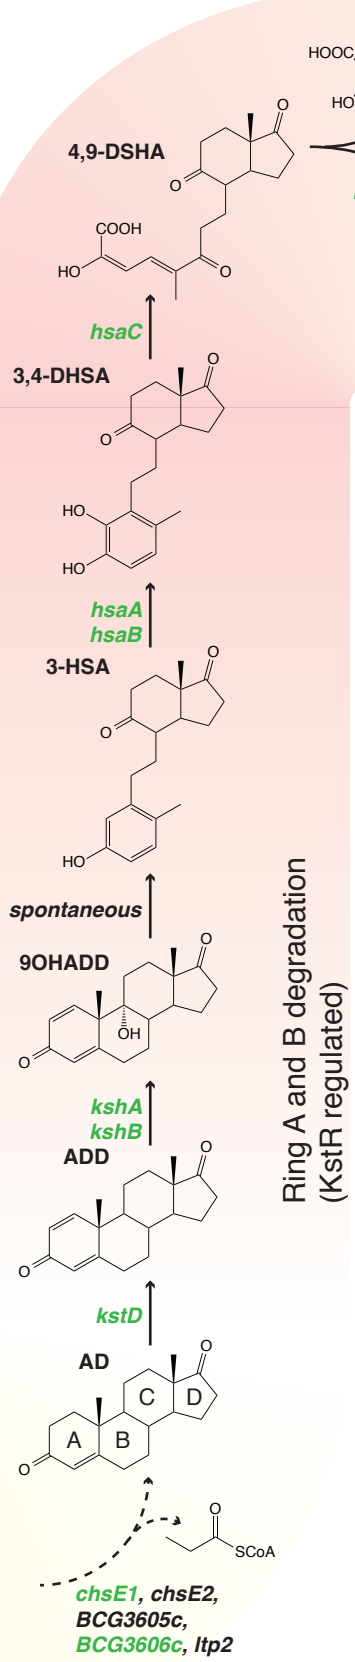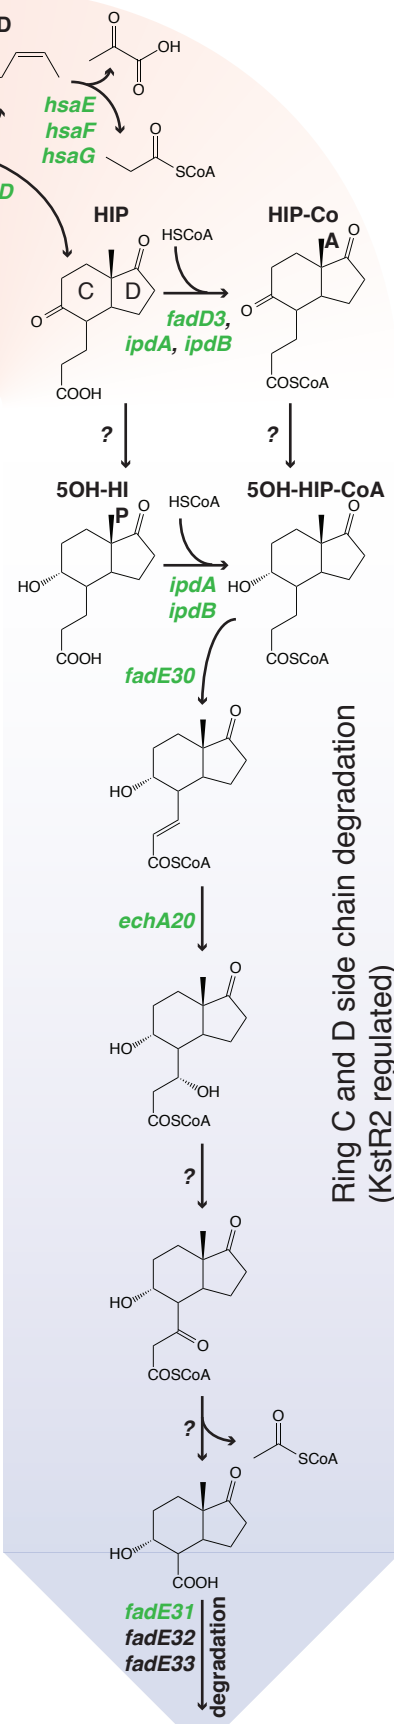

Supplement: 12864_2014_1197_MOESM3_ESM.pdf [file 12864_2014_1197_MOESM3_ESM.pdf]
